# Supplementary material
Source: publisher figshare collection journal article supplement (https://aacr.figshare.com/articles/dataset/_/23853113)
Supplement: Supplementary file 1 [file 41846552]

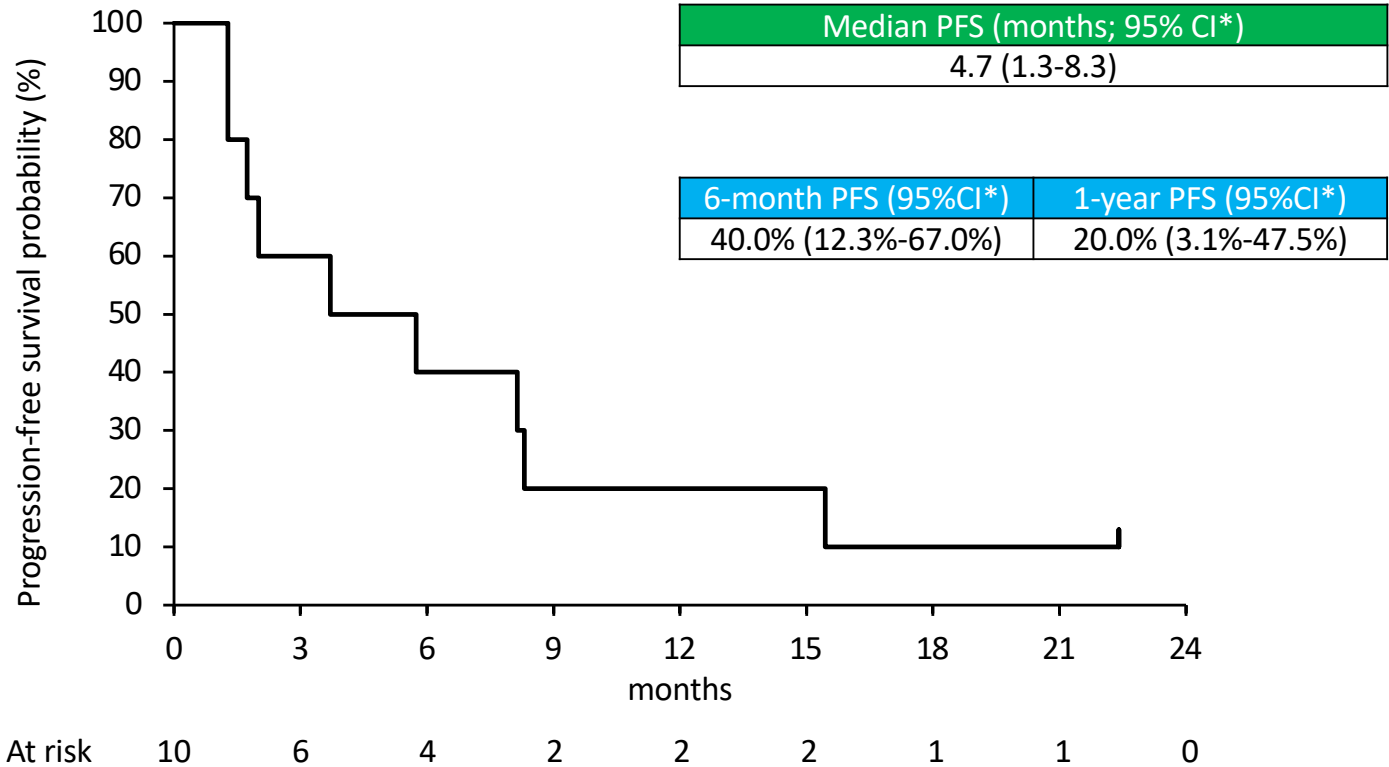

\*Confidence interval by the method of Brookmeyer and Crowley

## **Supplementary Fig. S4A. Progression-free survival.**

Abbreviations: PFS, progression-free survival ; CI, confidence interval
